# Supplementary material
Source: Springer Nature journal article supplement (https://www.springermedizin.de/resource/supplementary/12913_2008_711_MOESM1_ESM.pdf/9535368)
Supplement: MOESM1 [file 9535368]

Residents from 10  
homes  
N=462

Non-Eligibility:  
-Terminal ill  
-No informed consent  
-Admission nursing  
home

Eligible & informed consent  
N=335 (72.5%)  
n=280 residents  
n=55 proxies

R

5 Intervention homes  
N=202

5 Control homes  
N=136
